# Supplementary material for: High-Resolution Functional Profiling of Hepatitis C Virus Genome
Source: PubMed Central journal article supplement (PMC2564836; doi:10.1371/journal.ppat.1000182), 2008-10-17

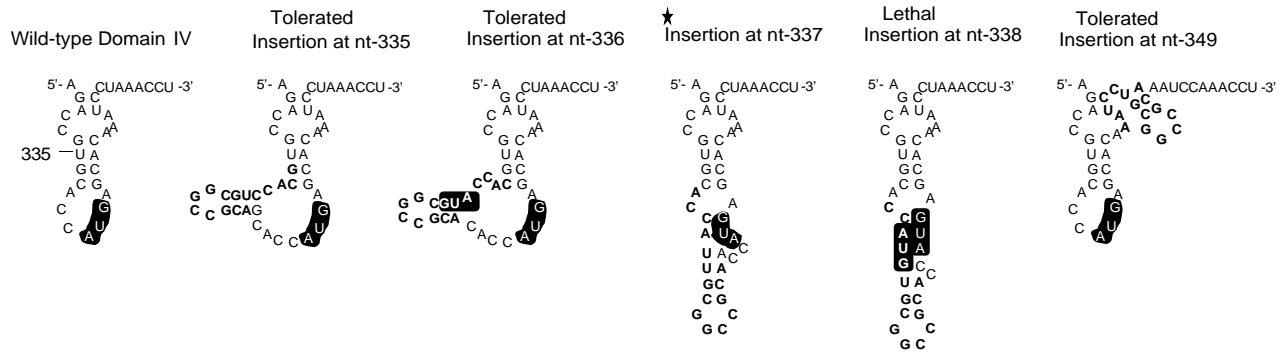

Supplement: ppat.1000182.s005.pdf [file ppat.1000182.s005.pdf]
