# Supplementary material for: High-Resolution Functional Profiling of Hepatitis C Virus Genome
Source: PubMed Central journal article supplement (PMC2564836; doi:10.1371/journal.ppat.1000182), 2008-10-17
Supplement: ppat.1000182.s009.pdf [file ppat.1000182.s009.pdf]

Table S1. Primers and the location of HCV fragments

| Fragment | Regions covered | Genome location | Amplicon size (nt) | Forward Primer (5'-3')  | Reverse Primer (5'-3')         |
|----------|-----------------|-----------------|--------------------|-------------------------|--------------------------------|
| F1       | 5'NTR-C-E1      | 20-1059         | 1040               | GACTACTCCGCCATGAATCACT  | ACCCAACACCGTGACGTATT           |
| F2       | E1-E2           | 815-1905        | 1091               | GAGGACGGGGTTAATTATGCAA  | TCGGTCGTGCCCACTACTA            |
| F3       | E2-p7           | 1672-2724       | 1053               | CAACCGCTTTAACTCGTCA     | GTGAGGCAATAGGTGGTCAA           |
| F4       | p7-NS2          | 2464-3497       | 1034               | CCTCTCACCTGCTATCACAA    | CCGTCATACTACCACTATG            |
| F5       | NS2-NS3         | 3263-4301       | 1039               | GTGGAACCCATCATCTTCA     | CATCGCATATGATGATGTCATAG        |
| F6       | NS3             | 4030-5063       | 1034               | GTACTTGCATGCTCCAAC      | GGGCGTCTATGTGTGTGA             |
| F7       | NS3-NS4B        | 4822-5890       | 1069               | CACAGGTAGAGGAAGACA      | CTTACCCAGGCCTATGCTG            |
| F8       | NS4B-NS5A       | 5615-6682       | 1068               | CCCAAAGTGAACAATTTTG     | CAGATTGTCAGTGGTCAGTC           |
| F9       | NS5A            | 6450-7507       | 1058               | CCAACATCTCTGGCAATGT     | GGCGGAACCTGTCTCTGA             |
| F10      | NS5A-NS5B       | 7229-8251       | 1023               | CTCGTGGAAATCGTGGAGGA    | GTACTGGAAGCCATAGGAAG           |
| F11      | NS5B            | 8010-8878       | 869                | CCGTAAACCACATCAAGTC     | AGGGGAGTGTCTAACTGTTT           |
| F12      | NS5B            | 8621-9481       | 861                | GACCTAGTAGTCATCTCAGAA   | GGAACAGTTAGCTATGGAGTGTAC       |
| F13      | NS5B-3'NTR      | 9237-9648       | 412                | ATCTCTTCAATTGGGCGGTGAAG | CTCTCTGCAGTCATGCGGCTCACGGACCTT |
