# Supplementary material for: High-Resolution Functional Profiling of Hepatitis C Virus Genome
Source: PubMed Central journal article supplement (PMC2564836; doi:10.1371/journal.ppat.1000182), 2008-10-17
Supplement: ppat.1000182.s010.pdf [file ppat.1000182.s010.pdf]

Table S2. Primers used for Functional Profiling analysis of HCV genome.

| Primer Name | Primer Sequence (5'-3')        | Fragment covered |
|-------------|--------------------------------|------------------|
| JFH-20      | GAC ACT CCG CCA TGA ATC ACT    | F1               |
| JFH-133     | AGA GCC ATA GTG GTC TGC GGA    | F1               |
| JFH-394     | CCC AGA AGA CGT TAA GTT C      | F1               |
| JFH-593     | CTA TAT GGG AAT GAG GGA CT     | F1               |
| JFH-815     | GAG GAC GGG GTT AAT TAT GCA A  | F1, F2           |
| JFH-1029    | AGA GAG TGG GGA ATA CGT C      | F2               |
| JFH-1244    | CAA GAA TGC AAT TGC TCC A      | F2               |
| JFH-1452    | TCA TTG TCA TCC TTC TGC T      | F2               |
| JFH-1672    | CAA CCG CTT TAA CTC GTC A      | F2, F3           |
| JFH-1858    | CCC AGT GTA CTG TTT CAC        | F3               |
| JFH-2056    | CAC CAG AGC TGA CTT CAA C      | F3               |
| JFH-2278    | CGC ATG CAA CTT CAC TCG T      | F3               |
| JFH-2464    | CCT CTC ACC TGC TAT CAC AA     | F3, F4           |
| JFH-2659    | CAT CTT CTT CGT GGC AGC TT     | F4               |
| JFH-2876    | TG TCT GTG GTG GTT GTG CT      | F4               |
| JFH-3068    | TTG ACA CAT GTG CCG TAC TT     | F4               |
| JFH-3263    | GTG GAA CCC ATC ATC TTC A      | F4, F5           |
| JFH-3431    | GCT CCC ATC ACT GCT TAT        | F5               |
| JFH-3613    | CAA GAC TCT AGC CGG CTT AC     | F5               |
| JFH-3819    | GAC CCA TTT CGA CCT TGA AG     | F5               |
| JFH-4030    | GTA CTT GCA TGC TCC AAC T      | F5, F6           |
| JFH-4233    | CCA CAT ATG GCA AAT TTC TC     | F6               |
| JFH-4427    | CAT CCC GAT ATA GAA GAG GT     | F6               |
| JFH-4620    | TCT CCA TAA TAC CAG CTC AG     | F6               |
| JFH-4822    | CAC AGG TAG AGG AAG ACA        | F6, F7           |
| JFH-5015    | CTT GAA TTT TGG GAG GCA GT     | F7               |
| JFH-5216    | ACA CCT CTC CTG TAC CGT T      | F7               |
| JFH-5417    | AAC CAG CGA GTC GTC GTT        | F7               |
| JFH-5615    | CCC AAA GTG GAA CAA TTT TG     | F7, F8           |
| JFH-5831    | ACC GGC TTT GTC GTC AGT        | F8               |
| JFH-6040    | CAT CTG CGC GGC CAT TCT        | F8               |
| JFH-6234    | ACA ATT GGA TAA CTG AGG ACT    | F8               |
| JFH-6450    | CCA ACA TCT CTG GCA ATG T      | F8, F9           |
| JFH-6641    | GGG TCG TAC TCC TAT GTA AC     | F9               |
| JFH-6855    | CAG ACG TAT TGA GGT CCA TG     | F9               |
| JFH-7025    | GAC ATG GTC GAT GCC AAC        | F9               |
| JFH-7229    | CTC GTG GAA TCG TGG AGG A      | F9, F10          |
| JFH-7416    | GTG ATG CAG GCT CGT CCA        | F10              |
| JFH-7620    | GGT CTT GGT CTA CTT GCT C      | F10              |
| JFH-7820    | GTA ACT TTT GAC AGG ACG CA     | F10              |
| JFH-8010    | CCG TTA ACC ACA TCA AGT C      | F10, F11         |
| JFH-8209    | GCT TCC TCA GGC GGT AAT        | F11              |
| JFH-8418    | CTG CCA TAC ACT CGC TGA        | F11              |
| JFH-8621    | GAC CTA GTA GTC ATC TCA GAA    | F11, F12         |
| JFH-8822    | AGA GAC CCA ACC ACT CCA        | F12              |
| JFH-9011    | GGA TCA GTA TAC TCC GTG AA     | F12              |
| JFH-9237    | ATC TCT TCA ATT GGG CGG TGA AG | F12, F13         |
| JFH-9406    | CGT AGG GGT AGG CCT CTT        | F13              |
